# Supplementary material for: Identification of key contributors in complex population structures
Source: PLOS journal article supplement (doi:10.1371/journal.pone.0177638), 2017-05-16

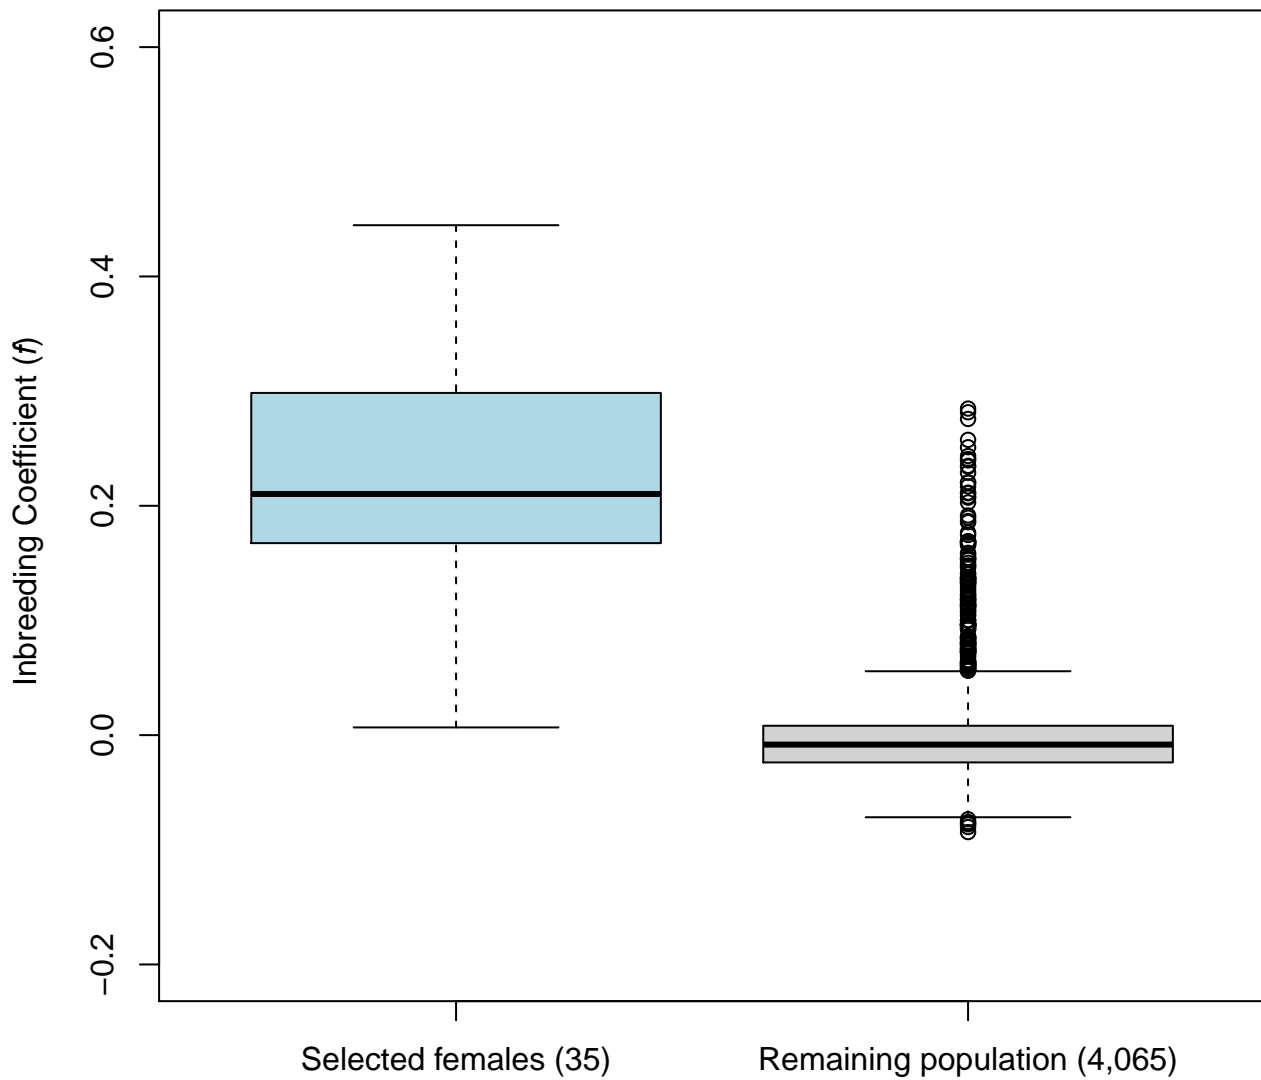

Supplement: S2 (10.1371/journal.pone.0177638.s002) [file journal.pone.0177638.s002]
